# Supplementary material for: Supramolecular Fluorescence Probe Based on Twisted Cucurbit[14]uril for Sensing Fungicide Flusilazole
Source: Front Chem. 2019 Mar 21;7:154. doi: 10.3389/fchem.2019.00154 (PMC6437033; doi:10.3389/fchem.2019.00154)
Supplement: Supplementary file 1 [file Data_Sheet_1.doc]

SUPPORTING INFORMATION

**A supramolecular fluorescence probe based on twisted cucurbit[14]uril for sensing fungicide** **flusilazole**

Ying Fan,a,b Rui-Han Gao,b Ying Huang,b Bing Bian,c Zhu Tao*b and Xin Xiao*b

aState Key Laboratory Breeding Base of Green Pesticide and Agricultural Bioengineering, Key Laboratory of Green Pesticide and Agricultural Bioengineering, Ministry of Education, Guizhou University, Guiyang 550025, P. R. China

bKey Laboratory of Macrocyclic and Supramolecular Chemistry of Guizhou Province, Guizhou University, Guiyang 550025, P. R. China

cCollege of Chemical and Environmental Engineering, Shandong University of Science and Technology, Qingdao 266590, P. R. China

E-mail: gyhxxiaoxin@163.com (X. Xiao) and gzutao@263.net (Z. Tao)

**TABLE OF CONTENTS**

**Figure S1** Fluorescence titration spectra (λex = 448 nm) of ThT@*t*Q[14] (1:1, 1 *μ*M) in the presence of different stoichiometries of triazole pesticides / *μ*M: 0, 0.25, 0.5, 0.75, 1.0, 1.25, 1.5, 1.75 and 2.0. (a) azaconazole, (b) triadimefon, (c) tebuconazole, (d) tricyclazole, (e) flutriafol, (f) penconazole and (g) triadimenol isomer A, respectively.

**Figure S2** (left) Fluorescence titration spectra (λex = 448 nm) of ThT@*t*Q[14] (1:5, 1 *μ*M) in the presence of different stoichiometries of flusilazole / *μ*M: 0, 0.25, 0.5, 0.75, 1.0, 1.25, 1.5, 1.75, 2.0, 2.5, 3.0, 3.5 and 4.0; (right) Profile of fluorescence intensity of ThT@*t*Q[14] *vs* Cflusilazole/CThT*@t*Q[14].

**Figure S3** Fluorescence titration spectra (λex = 448 nm) of ThT@*t*Q[14] (1:5, 1 *μ*M) in the presence of different stoichiometries of triazole pesticides / *μ*M: 0, 0.25, 0.5, 0.75, 1.0, 1.25, 1.5, 1.75 and 2.0. (a) azaconazole, (b) triadimefon, (c) tebuconazole, (d) tricyclazole, (e) flutriafol, (f) penconazole and (g) triadimenol isomer A, respectively.

**Figure S4** Nonlinear fitted fluorescence data for *t*Q[14]ThT (1:1, 1 *μ*M) with flusilazole.

**Figure S5** Standard calibration curves of the complexes of flusilazole with ThT*@t*Q[14] (1:1).

**Figure S6** Standard calibration curves of the complexes of flusilazole with ThT*@t*Q[14] (1:5).

**Figure S7** Fluorescence titration spectra (λex = 448 nm) of *t*Q[14]ThTflusilazole (1:1:1, 1 *μ*M) in the presence of different stoichiometries (a) Na+, (b) K+, (c) Zn2+, (d) Mg2+, (e) Cu2+, (f) Cl, (g) Br, (h) NO3, (i) HSO4 and (j) H2PO4.

**Figure S8** (left) Fluorescence titration spectra (λex = 448 nm) of *t*Q[14]ThTflusilazole (1:1:1, 1 *μ*M) in the presence of different stoichiometries of Ca2+ / *μ*M: 0, 10, 20, 40, 60, 80, 100, 120, 140, 160, 180 and 200; (right) Profile of fluorescence intensity of *t*Q[14]-ThT-flusilazole *vs* CCa2+/C*t*Q[14]-ThT-flusilazole.

**Figure S9** Titration 1H NMR spectra (400 MHz, D2O) of (a) ThT, (b) *t*Q[14]–ThT (1:1), (c) *t*Q[14]–ThT–azaconazole (1:1:1), (d-i) *t*Q[14]–ThT–azaconazole (1:1:1) in the presence of Ca2+.

**Figure S10** 1H NMR spectra (400 MHz, D2O) of (a) ThT, (b) *t*Q[14]–ThT (1:1), (c) *t*Q[14]–ThT–azaconazole (1:1:0.5), (d) *t*Q[14]–ThT–azaconazole (1:1:1), (e) *t*Q[14]–ThT–azaconazole (1:1:2), (f) *t*Q[14]–azaconazole and (g) azaconazole.

**Figure S11** 1H NMR spectra (400 MHz, D2O) of (a) ThT, (b) *t*Q[14]–ThT (1:1), (c) *t*Q[14]–ThT–triadimefon (1:1:1), (d) *t*Q[14]–ThT–triadimefon (1:1:2), (e) *t*Q[14]–triadimefon and (f) triadimefon.

**Figure S12** 1H NMR spectra (400 MHz, D2O) of (a) ThT, (b) *t*Q[14]–ThT (1:1), (c) *t*Q[14]–ThT–tebuconazole (1:1:1), (d) *t*Q[14]–ThT–tebuconazole (1:1:2), (e) *t*Q[14]–tebuconazole and (f) tebuconazole.

**Figure S13** 1H NMR spectra (400 MHz, D2O) of (a) ThT, (b) *t*Q[14]–ThT (1:1), (c) *t*Q[14]–ThT–tricyclazole (1:1:1), (d) *t*Q[14]–ThT–tricyclazole (1:1:2), (e) *t*Q[14]–tricyclazole and (f) tricyclazole.

**Figure S14** 1H NMR spectra (400 MHz, D2O) of (a) ThT, (b) *t*Q[14]–ThT (1:1), (c) *t*Q[14]–ThT–flutriafol (1:1:1), (d) *t*Q[14]–ThT–flutriafol (1:1:2), (e) *t*Q[14]–flutriafol and (f) flutriafol.

**Figure S15** 1H NMR spectra (400 MHz, D2O) of (a) ThT, (b) *t*Q[14]–ThT (1:1), (c) *t*Q[14]–ThT–penconazole (1:1:1), (d) *t*Q[14]–ThT–penconazole (1:1:1), (e) *t*Q[14]–penconazole and (f) penconazole.

**Figure S16** 1H NMR spectra (400 MHz, D2O) of (a) ThT, (b) *t*Q[14]–ThT (1:1), (c) *t*Q[14]–ThT–triadimenol isomer A (1:1:1), (d) *t*Q[14]–ThT–triadimenol isomer A (1:1:2), (e) *t*Q[14]–triadimenol isomer A and (f) triadimenol isomer A.

**Figure S17** The DOSY spectra of *t*Q[14], ThT, flusilazole and *t*Q[14]-ThT-flusilazole (1:1:1) ternary interaction species in D2O at 298 K.

**Figure S18** Isothermal titration calorimetry profiles of *t*Q[14] in the presence of the guest ThT in aqueous solution at 298.15 K.

**Figure S19** Isothermal titration calorimetry profiles of *t*Q[14] in the presence of the guest flusilazole in aqueous solution at 298.15 K.

**Figure S20** Isothermal titration calorimetry profiles of *t*Q[14] in the presence of the guest azaconazole in aqueous solution at 298.15 K.

**Figure S21** Isothermal titration calorimetry profiles of *t*Q[14] in the presence of the guest triadimefon in aqueous solution at 298.15 K.

**Figure S22** Isothermal titration calorimetry profiles of *t*Q[14] in the presence of the guest tebuconazole in aqueous solution at 298.15 K.

**Figure S23** Isothermal titration calorimetry profiles of *t*Q[14] in the presence of the guest tricyclazole in aqueous solution at 298.15 K.

**Figure S24** Isothermal titration calorimetry profiles of *t*Q[14] in the presence of the guest flutriafol in aqueous solution at 298.15 K.

**Figure S25** Isothermal titration calorimetry profiles of *t*Q[14] in the presence of the guest penconazole in aqueous solution at 298.15 K.

**Figure S26** Isothermal titration calorimetry profiles of *t*Q[14] in the presence of the guest triadimenol isomer A in aqueous solution at 298.15 K.

**Figure S27** Fluorescence spectra (λex=448 nm) for ThT@HMeQ[6] (1:1, 1 *μ*M) and ThT@Q[7] (1:1, 1 *μ*M).


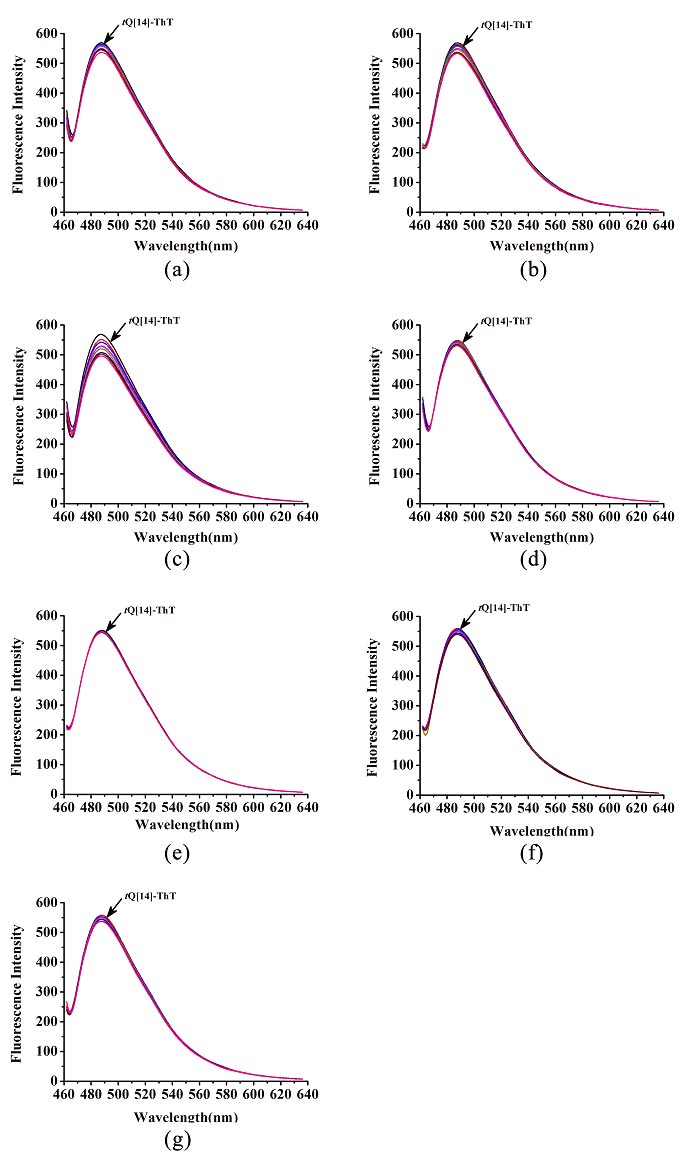


**Figure S1** Fluorescence titration spectra (λex = 448 nm) of ThT@*t*Q[14] (1:1, 1 *μ*M) in the presence of different stoichiometries of triazole pesticides / *μ*M: 0, 0.25, 0.5, 0.75, 1.0, 1.25, 1.5, 1.75 and 2.0. (a) azaconazole, (b) triadimefon, (c) tebuconazole, (d) tricyclazole, (e) flutriafol, (f) penconazole and (g) triadimenol isomer A, respectively.

**
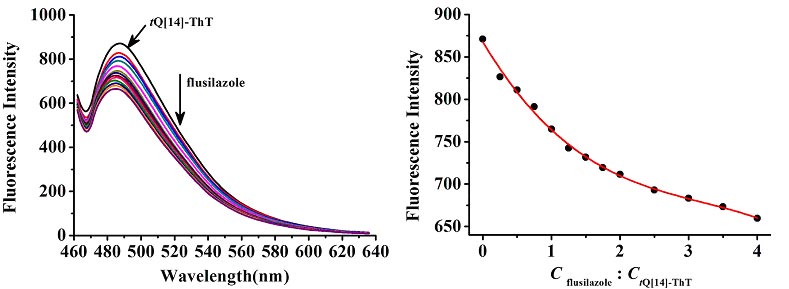
**

**Figure S2** (left) Fluorescence titration spectra (λex = 448 nm) of ThT@*t*Q[14] (1:5, 1 *μ*M) in the presence of different stoichiometries of flusilazole / *μ*M: 0, 0.25, 0.5, 0.75, 1.0, 1.25, 1.5, 1.75, 2.0, 2.5, 3.0, 3.5 and 4.0; (right) Profile of fluorescence intensity of ThT@*t*Q[14] *vs* Cflusilazole/CThT*@t*Q[14].

**
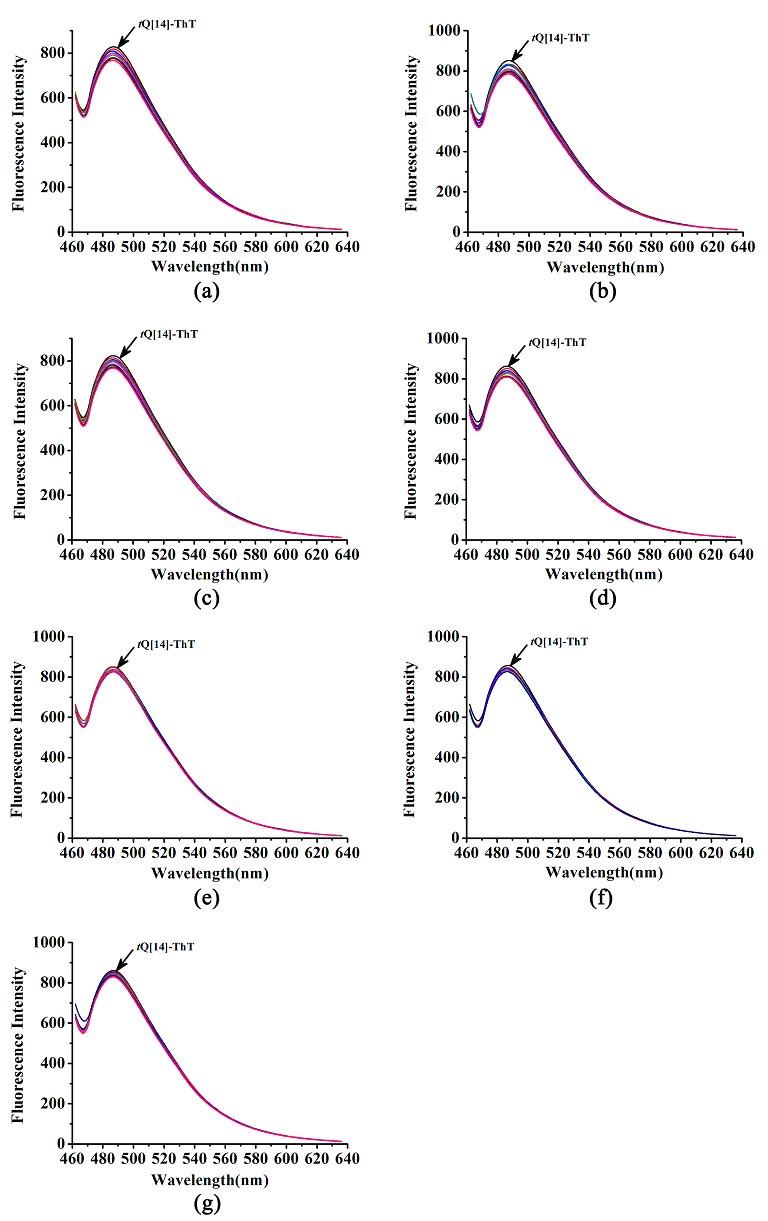
**

**Figure S3** Fluorescence titration spectra (λex = 448 nm) of ThT@*t*Q[14] (1:5, 1 *μ*M) in the presence of different stoichiometries of triazole pesticides / *μ*M: 0, 0.25, 0.5, 0.75, 1.0, 1.25, 1.5, 1.75 and 2.0. (a) azaconazole, (b) triadimefon, (c) tebuconazole, (d) tricyclazole, (e) flutriafol, (f) penconazole and (g) triadimenol isomer A, respectively.

**
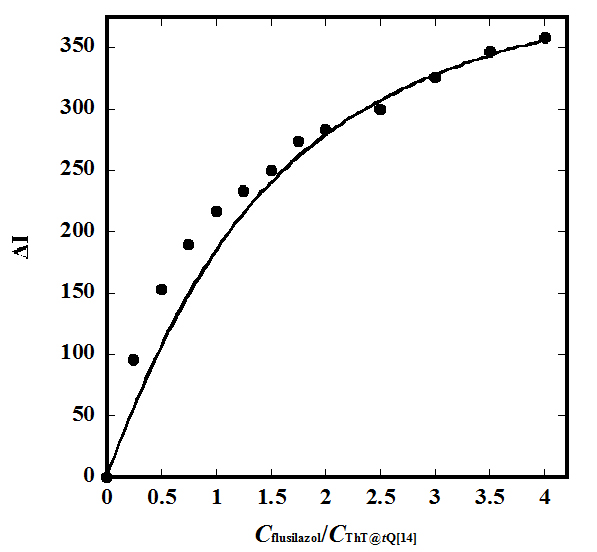
**

**Figure S4** Nonlinear fitted fluorescence data for *t*Q[14]ThT (1:1, 1 *μ*M) with flusilazole.

**Figure S5** Standard calibration curves of the complexes of flusilazole with ThT*@t*Q[14] (1:1).

**Figure S6** Standard calibration curves of the complexes of flusilazole with ThT*@t*Q[14] (1:5).

**
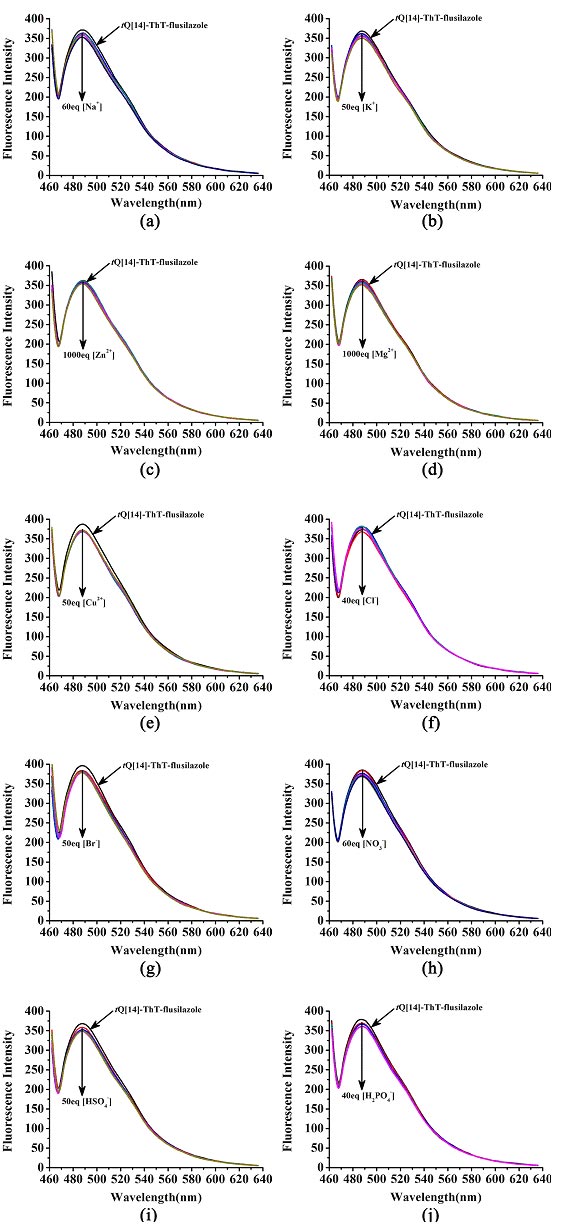
**

**Figure S7** Fluorescence titration spectra (λex = 448 nm) of *t*Q[14]ThTflusilazole (1:1:1, 1 *μ*M) in the presence of different stoichiometries (a) Na+, (b) K+, (c) Zn2+, (d) Mg2+, (e) Cu2+, (f) Cl, (g) Br, (h) NO3, (i) HSO4 and (j) H2PO4.

**
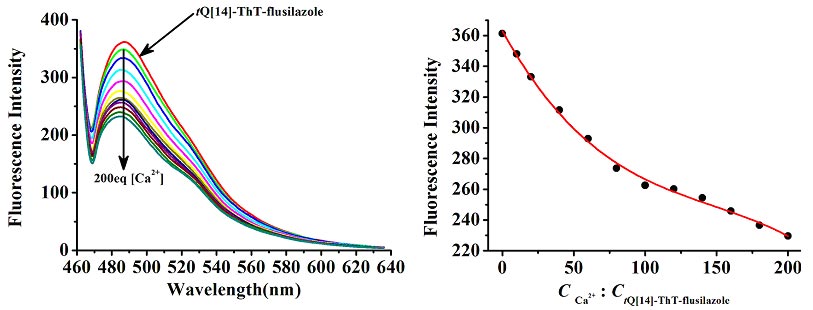
**

**Figure S8** (left) Fluorescence titration spectra (λex = 448 nm) of *t*Q[14]ThTflusilazole (1:1:1, 1 *μ*M) in the presence of different stoichiometries of Ca2+ / *μ*M: 0, 10, 20, 40, 60, 80, 100, 120, 140, 160, 180 and 200; (right) Profile of fluorescence intensity of *t*Q[14]-ThT-flusilazole *vs* CCa2+/C*t*Q[14]-ThT-flusilazole.

**
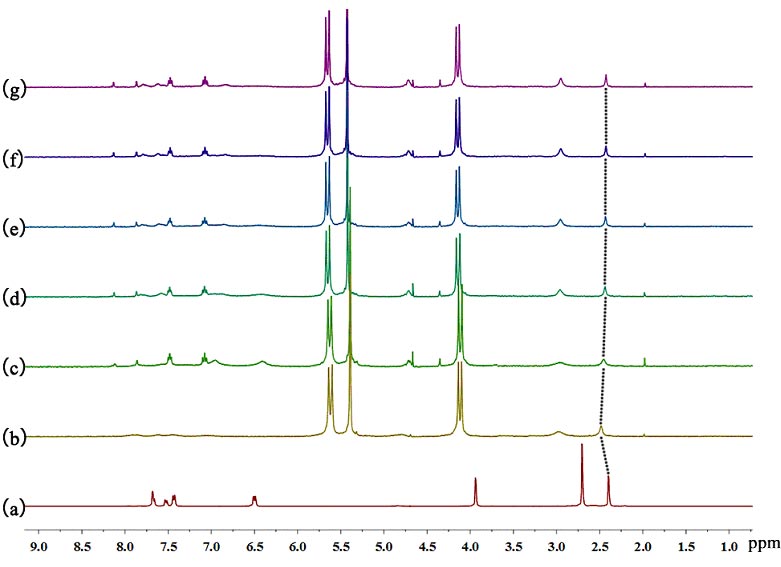
**

**Figure S9** Titration 1H NMR spectra (400 MHz, D2O) of (a) ThT, (b) *t*Q[14]–ThT (1:1), (c) *t*Q[14]–ThT–azaconazole (1:1:1), (d-g) *t*Q[14]–ThT–azaconazole (1:1:1) in the presence of Ca2+.

**
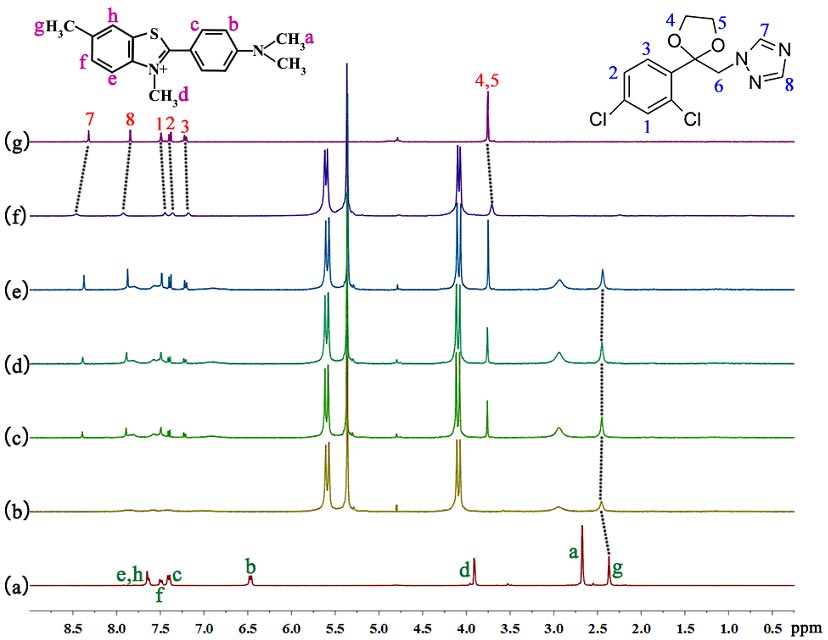
**

**Figure S10** 1H NMR spectra (400 MHz, D2O) of (a) ThT, (b) *t*Q[14]–ThT (1:1), (c) *t*Q[14]–ThT–azaconazole (1:1:0.5), (d) *t*Q[14]–ThT–azaconazole (1:1:1), (e) *t*Q[14]–ThT–azaconazole (1:1:2), (f) *t*Q[14]–azaconazole and (g) azaconazole.

**
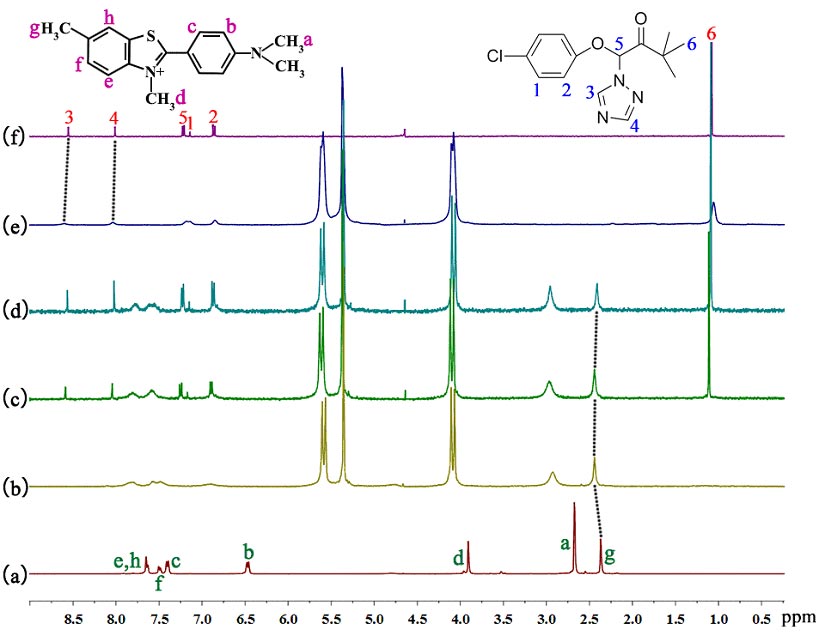
**

**Figure S11** 1H NMR spectra (400 MHz, D2O) of (a) ThT, (b) *t*Q[14]–ThT (1:1), (c) *t*Q[14]–ThT–triadimefon (1:1:1), (d) *t*Q[14]–ThT–triadimefon (1:1:2), (e) *t*Q[14]–triadimefon and (f) triadimefon.

**
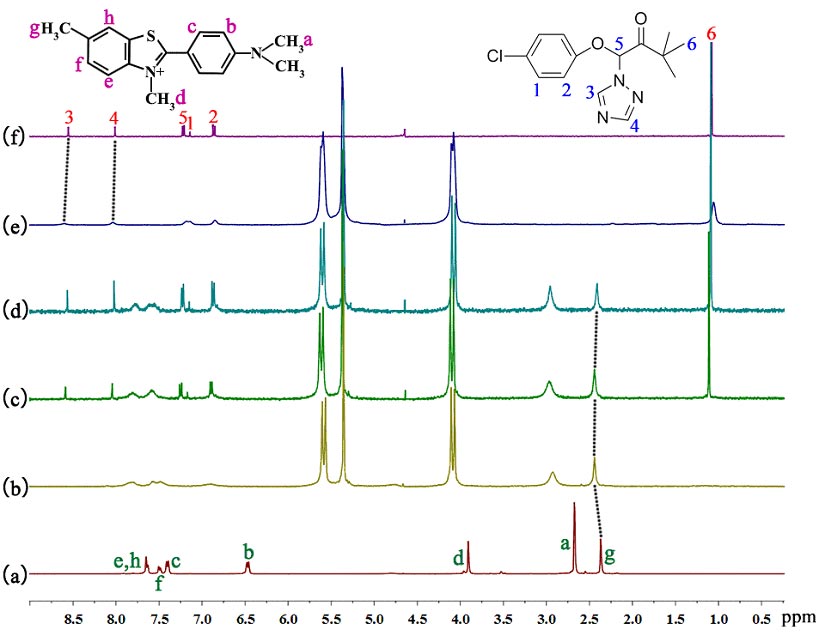
**

**Figure S12** 1H NMR spectra (400 MHz, D2O) of (a) ThT, (b) *t*Q[14]–ThT (1:1), (c) *t*Q[14]–ThT–tebuconazole (1:1:1), (d) *t*Q[14]–ThT–tebuconazole (1:1:2), (e) *t*Q[14]–tebuconazole and (f) tebuconazole.


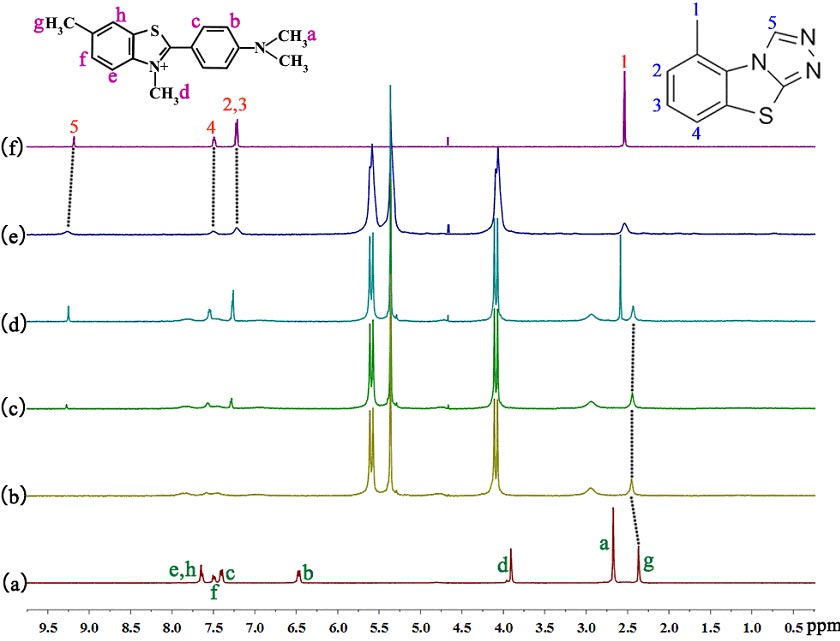


**Figure S13** 1H NMR spectra (400 MHz, D2O) of (a) ThT, (b) *t*Q[14]–ThT (1:1), (c) *t*Q[14]–ThT–tricyclazole (1:1:1), (d) *t*Q[14]–ThT–tricyclazole (1:1:2), (e) *t*Q[14]–tricyclazole and (f) tricyclazole.

**
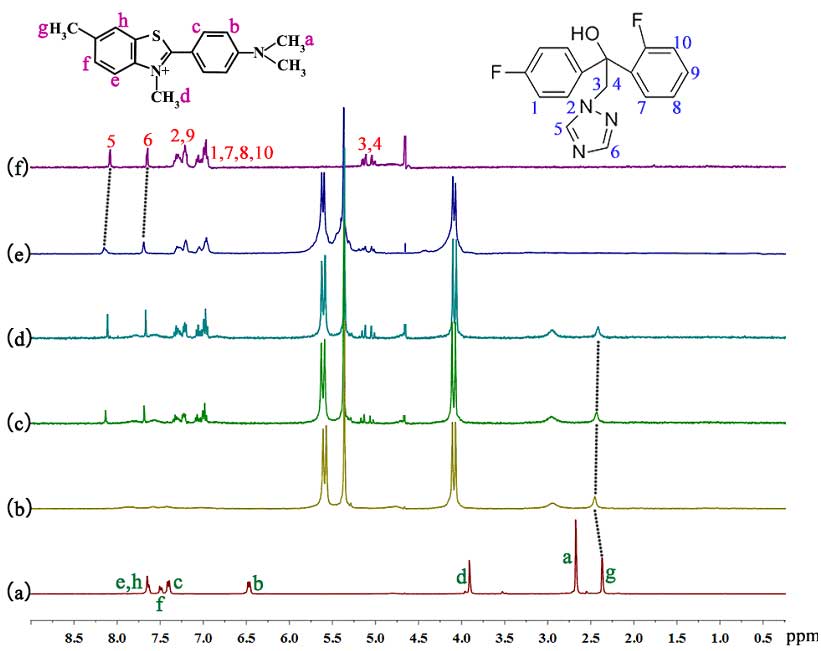
**

**Figure S14** 1H NMR spectra (400 MHz, D2O) of (a) ThT, (b) *t*Q[14]–ThT (1:1), (c) *t*Q[14]–ThT–flutriafol (1:1:1), (d) *t*Q[14]–ThT–flutriafol (1:1:2), (e) *t*Q[14]–flutriafol and (f) flutriafol.

**
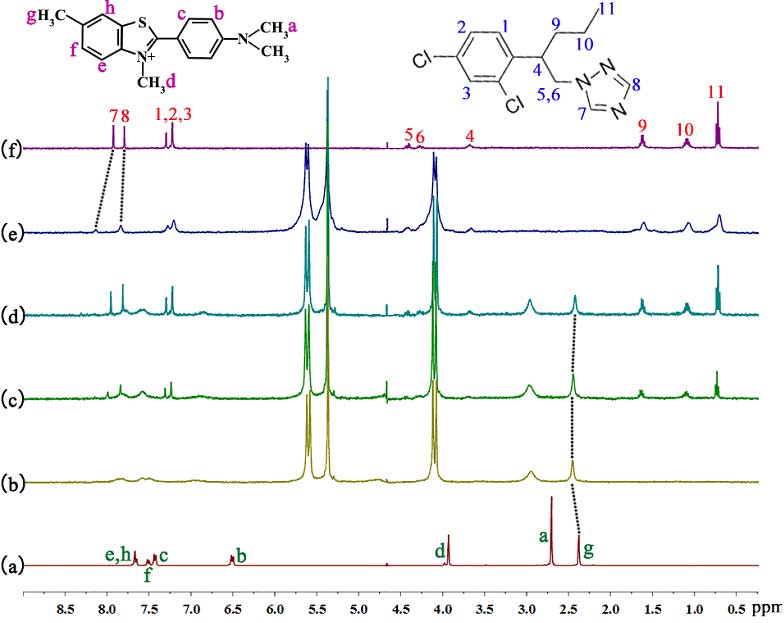
**

**Figure S15** 1H NMR spectra (400 MHz, D2O) of (a) ThT, (b) *t*Q[14]–ThT (1:1), (c) *t*Q[14]–ThT–penconazole (1:1:1), (d) *t*Q[14]–ThT–penconazole (1:1:1), (e) *t*Q[14]–penconazole and (f) penconazole.

**
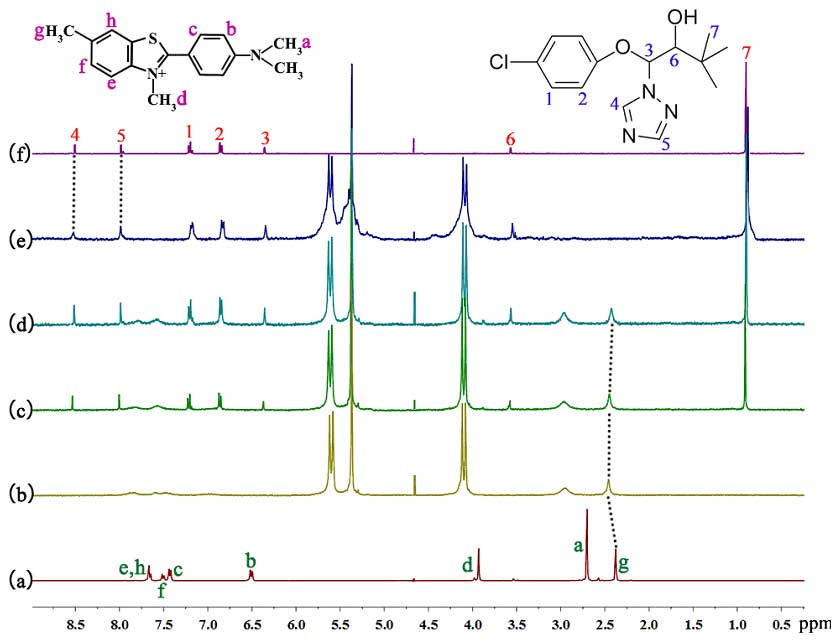
**

**Figure S16** 1H NMR spectra (400 MHz, D2O) of (a) ThT, (b) *t*Q[14]–ThT (1:1), (c) *t*Q[14]–ThT–triadimenol isomer A (1:1:1), (d) *t*Q[14]–ThT–triadimenol isomer A (1:1:2), (e) *t*Q[14]–triadimenol isomer A and (f) triadimenol isomer A.

*t*Q[14]


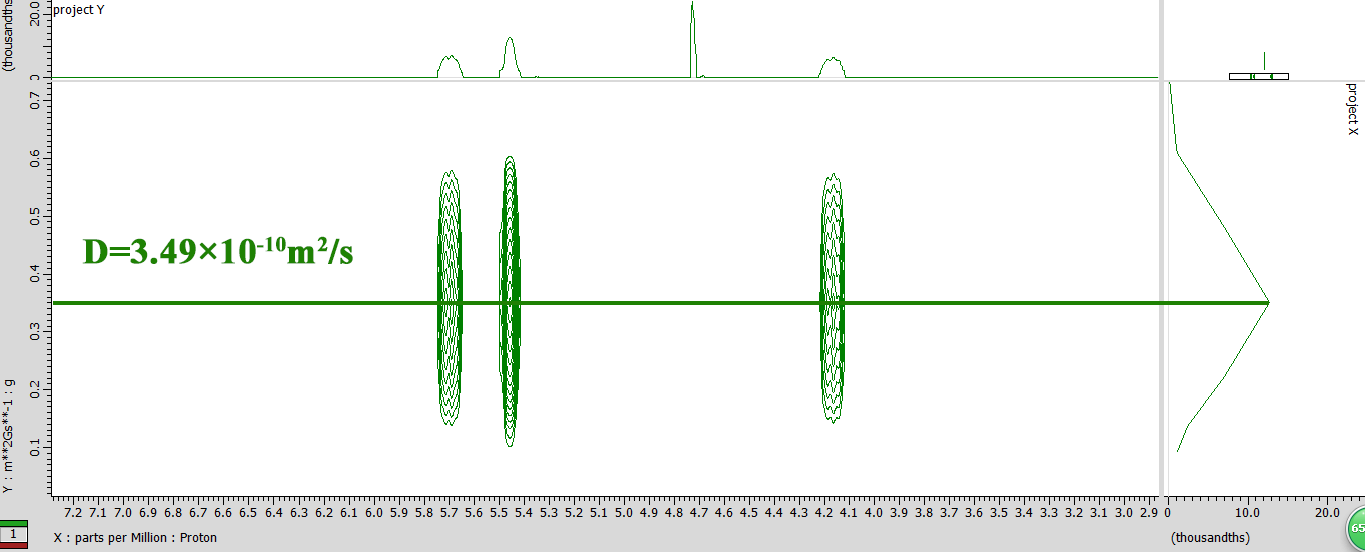


ThT


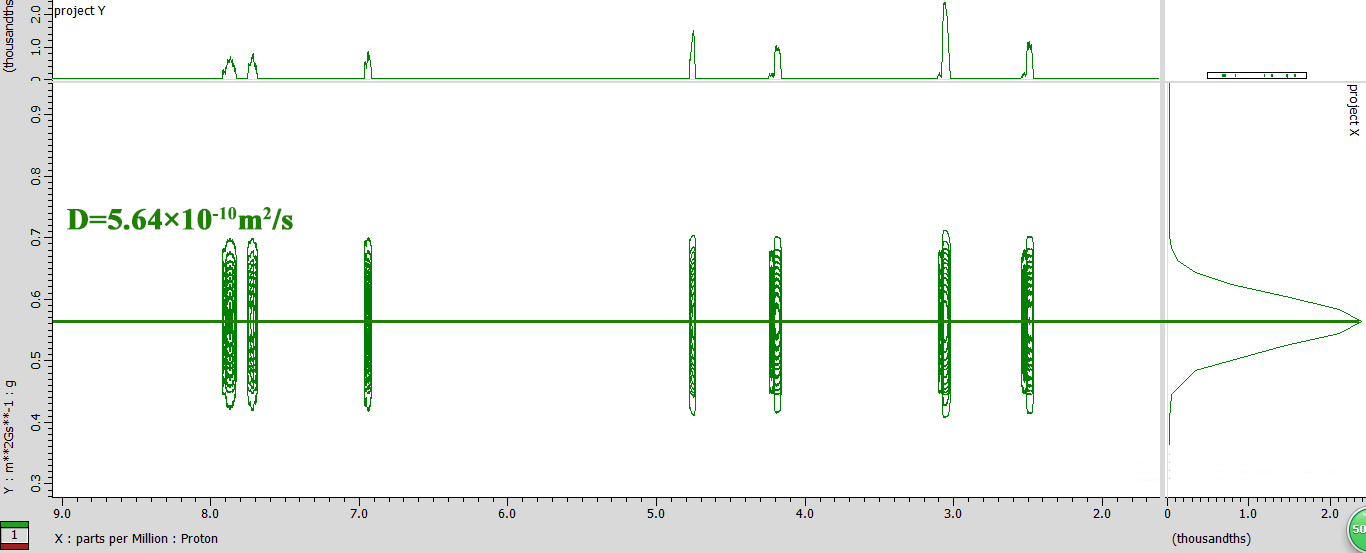


flusilazole


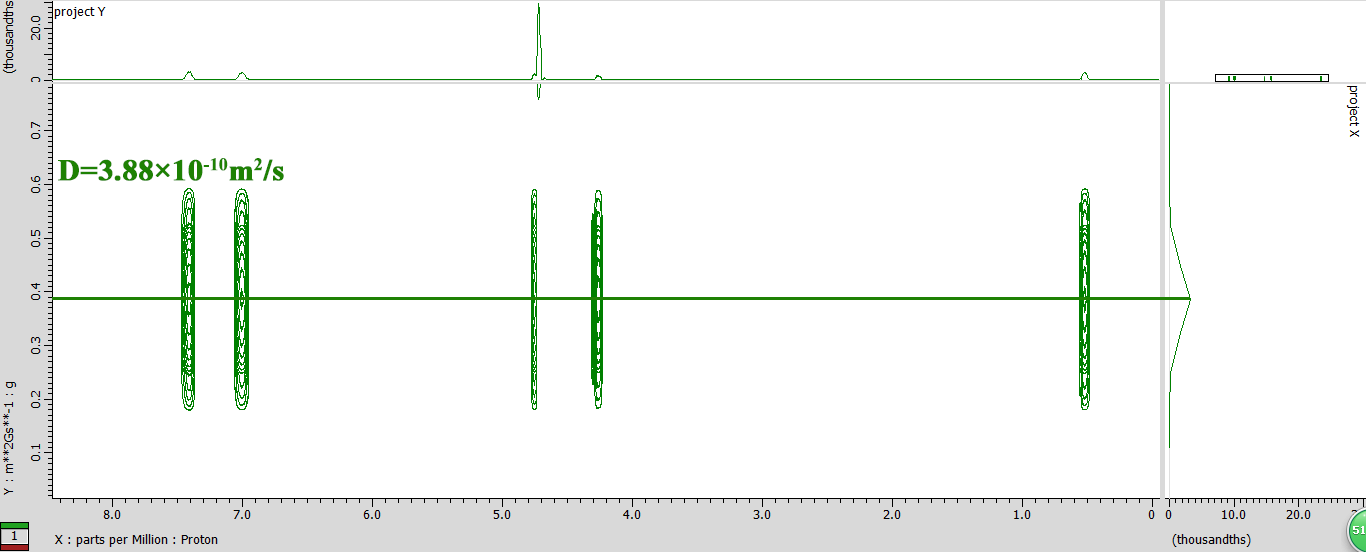


*t*Q[14]-ThT- flusilazole（1:1:1）


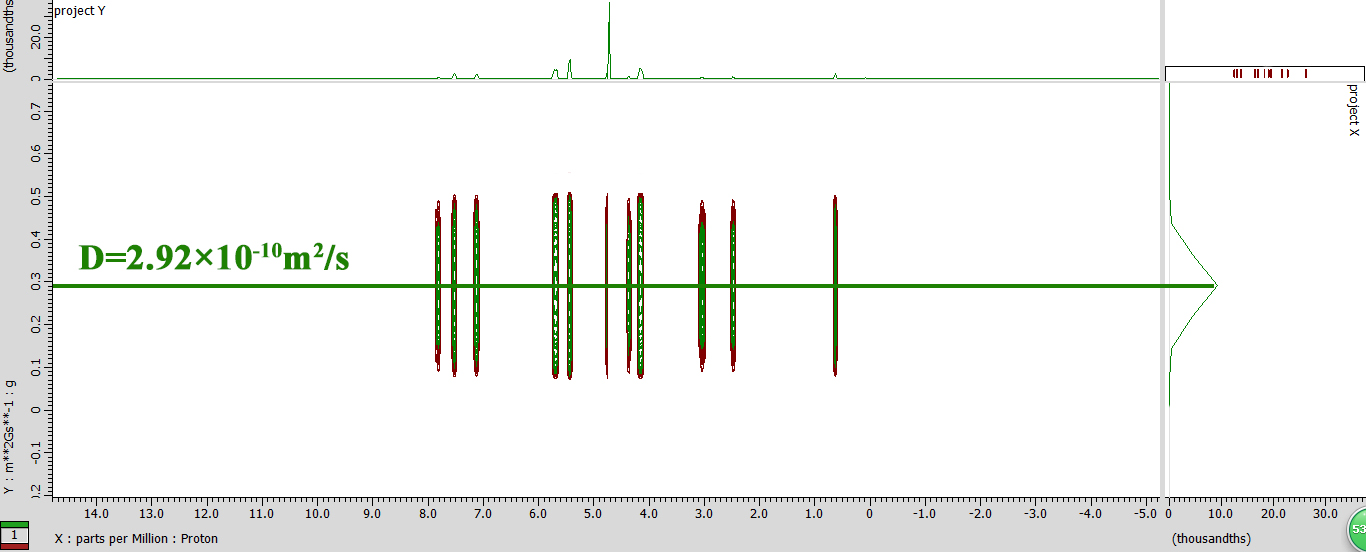


**Figure S17** The DOSY spectra of *t*Q[14], ThT, flusilazole and *t*Q[14]-ThT-flusilazole (1:1:1) ternary interaction species in D2O at 298 K.


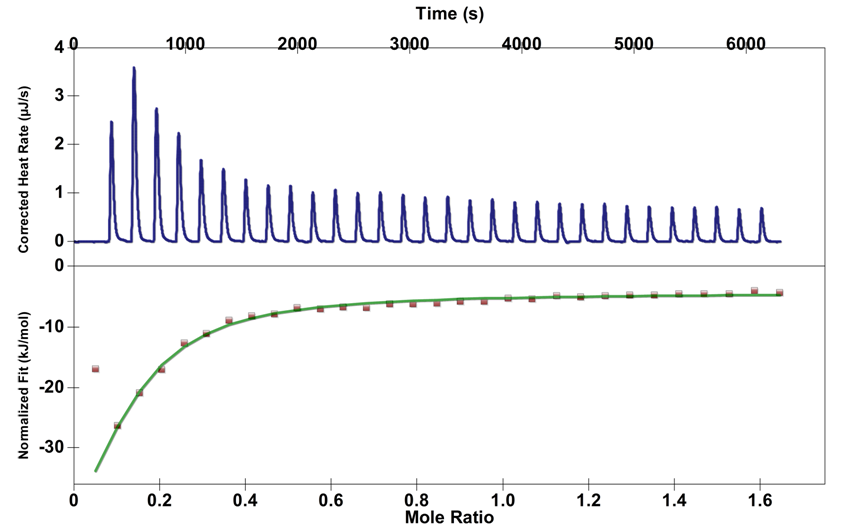


**Figure S18** Isothermal titration calorimetry profiles of *t*Q[14] in the presence of the guest ThT in aqueous solution at 298.15 K.


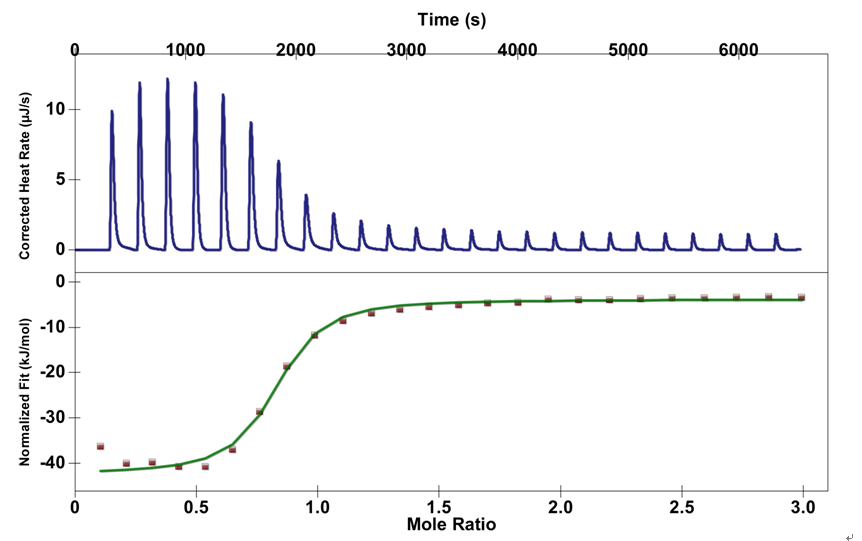


**Figure S19** Isothermal titration calorimetry profiles of *t*Q[14] in the presence of the guest flusilazole in aqueous solution at 298.15 K.


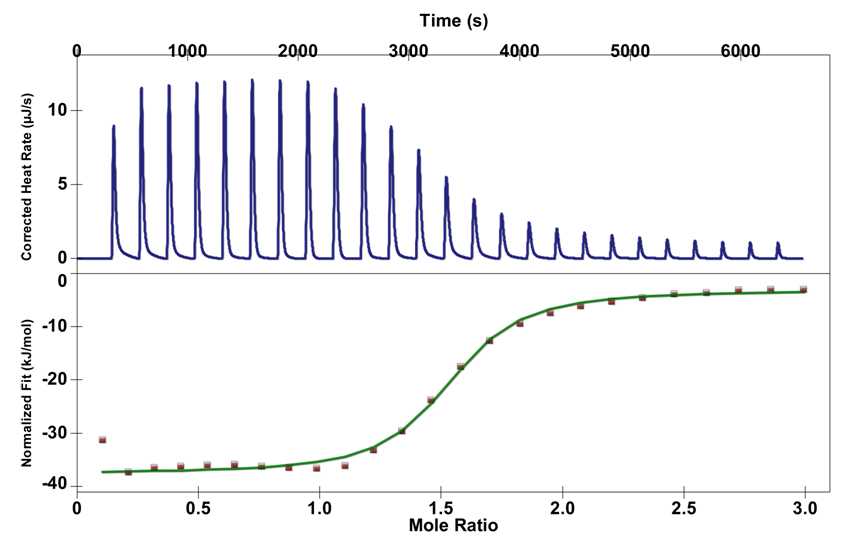


**Figure S20** Isothermal titration calorimetry profiles of *t*Q[14] in the presence of the guest azaconazole in aqueous solution at 298.15 K.

**
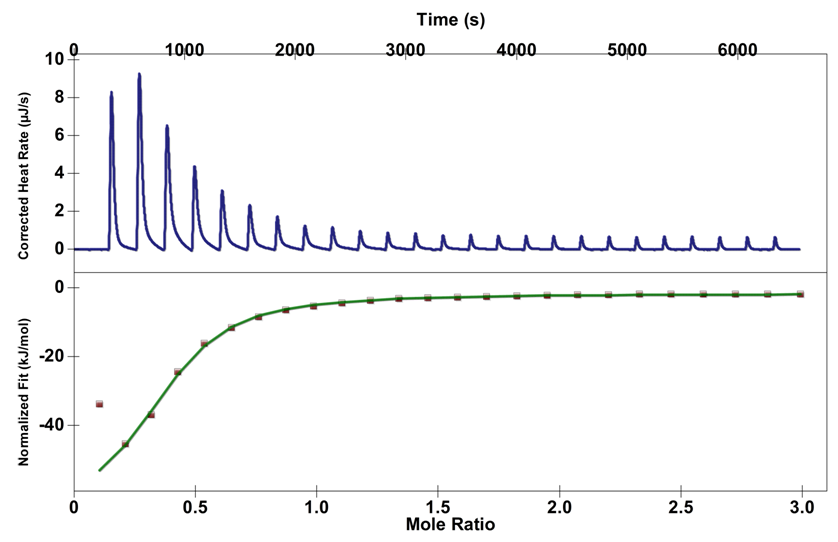
Figure S21** Isothermal titration calorimetry profiles of *t*Q[14] in the presence of the guest triadimefon in aqueous solution at 298.15 K.

**
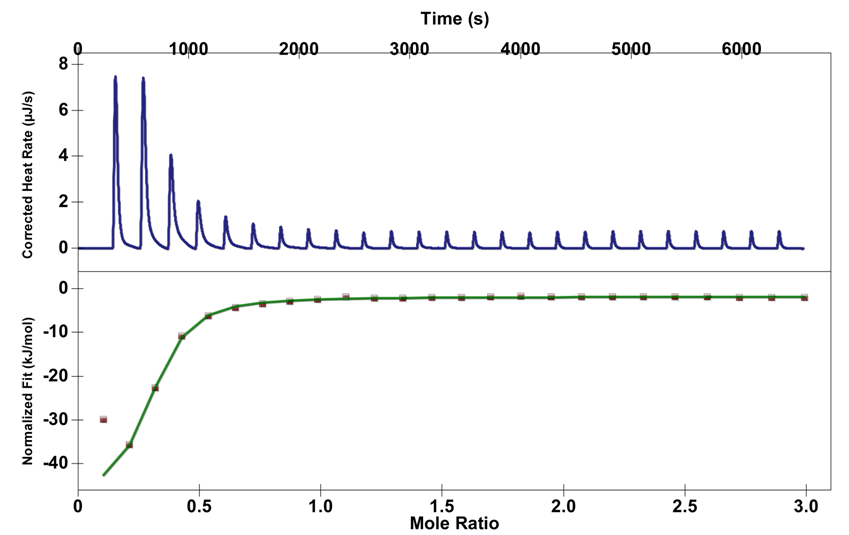
**

**Figure S22** Isothermal titration calorimetry profiles of *t*Q[14] in the presence of the guest tebuconazole in aqueous solution at 298.15 K.


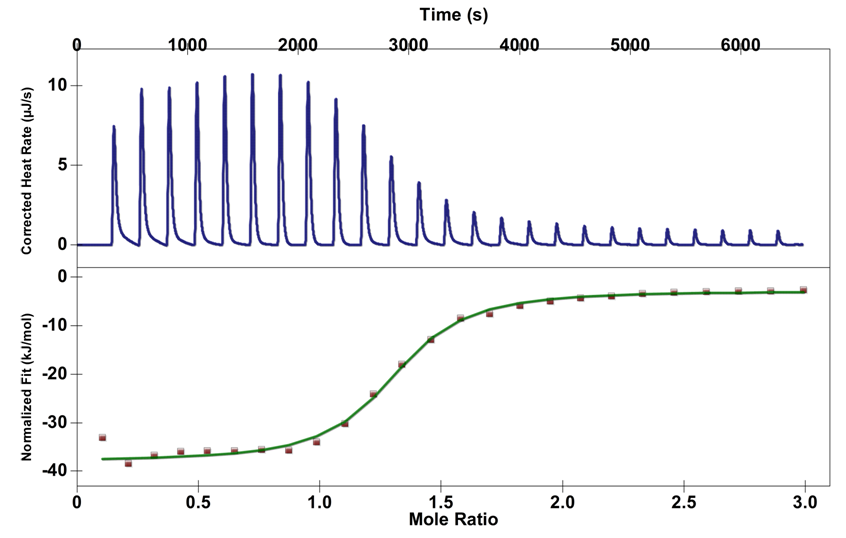


**Figure S23** Isothermal titration calorimetry profiles of *t*Q[14] in the presence of the guest tricyclazole in aqueous solution at 298.15 K.


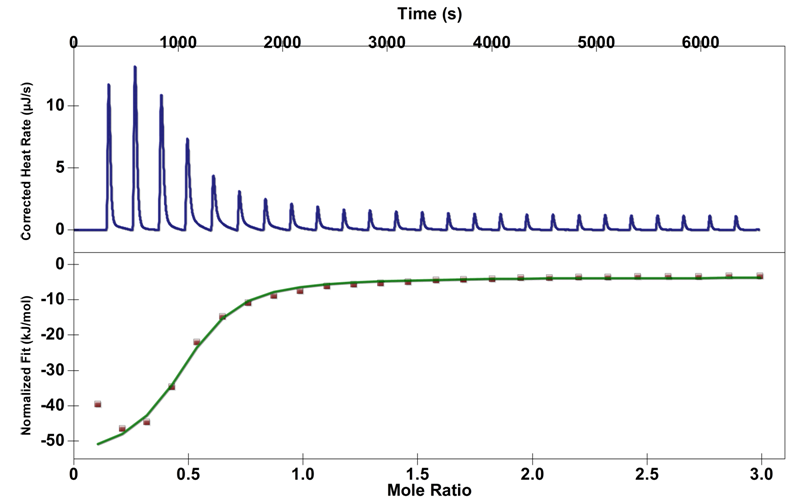


**Figure S24** Isothermal titration calorimetry profiles of *t*Q[14] in the presence of the guest flutriafol in aqueous solution at 298.15 K.


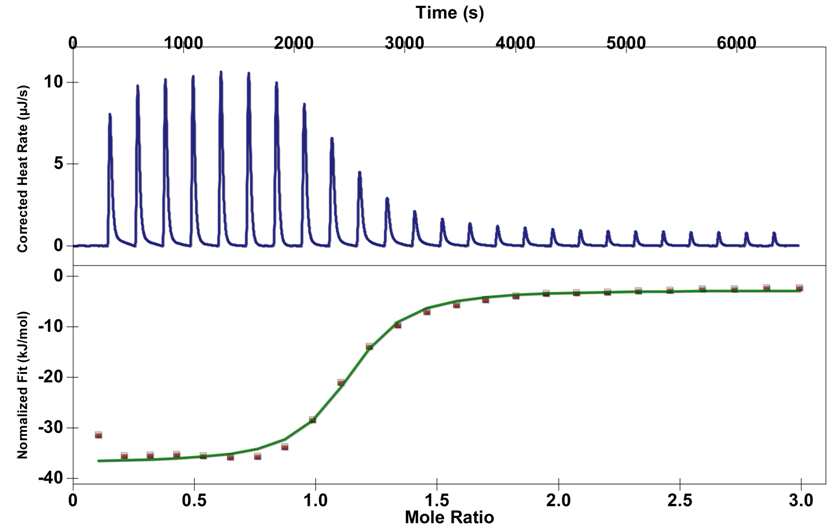


**Figure S25** Isothermal titration calorimetry profiles of *t*Q[14] in the presence of the guest penconazole in aqueous solution at 298.15 K.


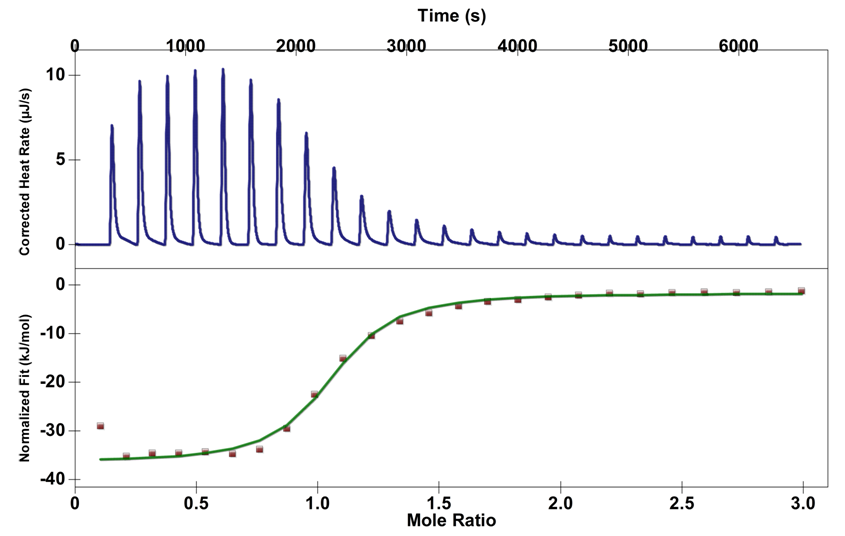


**Figure S26** Isothermal titration calorimetry profiles of *t*Q[14] in the presence of the guest triadimenol isomer A in aqueous solution at 298.15 K.


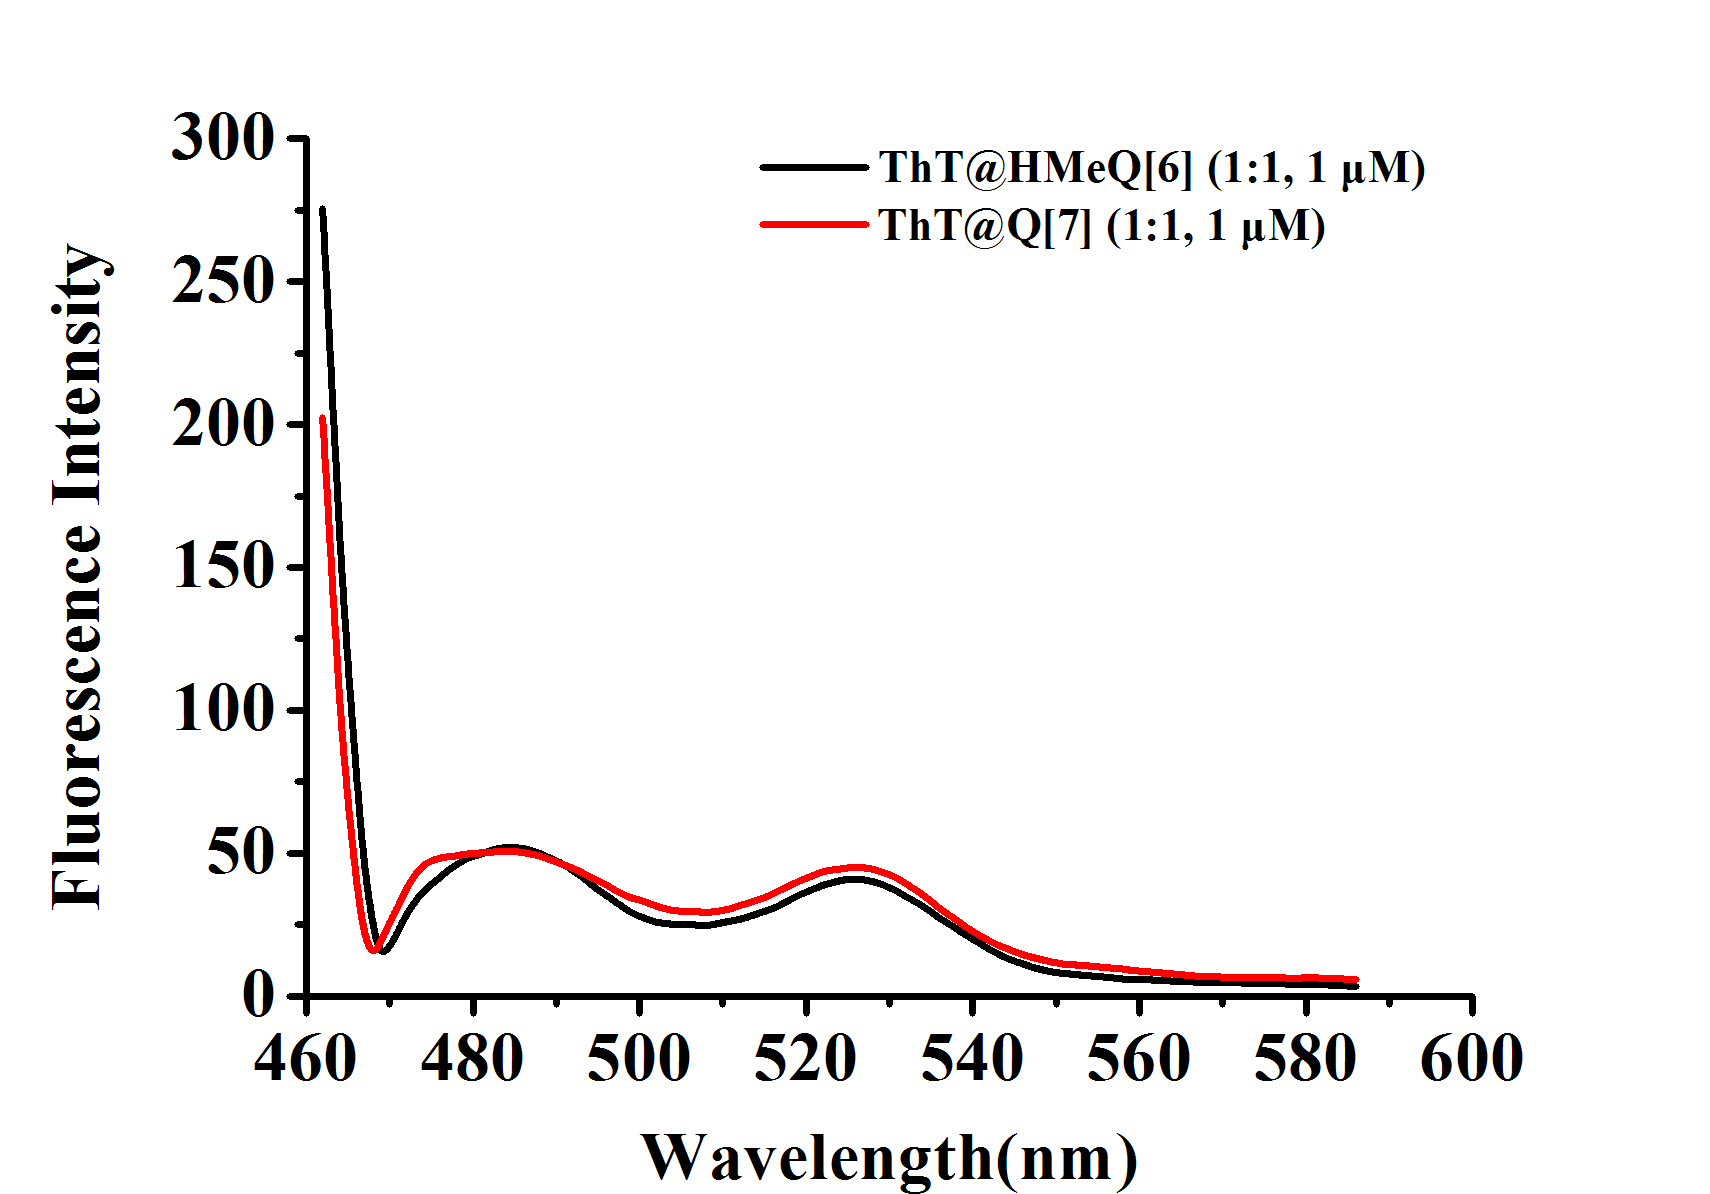


**Figure S27** Fluorescence spectra (λex=448 nm) for ThT@HMeQ[6] (1:1, 1 *μ*M) and ThT@Q[7] (1:1, 1 *μ*M).
